# Supplementary material for: Maternal iron metabolism gene variants modify umbilical cord blood lead levels by gene-environment interaction: a birth cohort study
Source: PubMed Central journal article supplement (PMC4271345; doi:10.1186/1476-069x-13-77), 2014-10-06
Supplement: 12940_2014_803_MOESM1_ESM.pdf [file 12940_2014_803_MOESM1_ESM.pdf]

Additional File 1: Parameter estimates from a multivariable regression model evaluating the effects of *infant* iron metabolism gene variants, log-transformed maternal blood lead, and their interaction on log-transformed umbilical cord blood lead.<sup>a, b, c</sup>

| Predictor                     | $\beta$ | 95% CI       | P-value         |
|-------------------------------|---------|--------------|-----------------|
| Constant                      | -0.17   | -0.20, -0.13 | <b>&lt;0.01</b> |
| Maternal Blood Lead (MBL)     | 0.89    | 0.78, 0.99   | <b>&lt;0.01</b> |
| Infant <i>TF P570S</i>        | -0.05   | -0.11, 0.01  | 0.10            |
| MBL x Infant <i>TF P570S</i>  | -0.09   | -0.28, 0.10  | 0.34            |
| Infant <i>HFE H63D</i>        | -0.03   | -0.09, 0.03  | 0.32            |
| MBL x Infant <i>HFE H63D</i>  | 0.02    | -0.16, 0.19  | 0.86            |
| Infant <i>HFE C282Y</i>       | -0.02   | -0.10, 0.06  | 0.63            |
| MBL x Infant <i>HFE C282Y</i> | -0.12   | -0.34, 0.09  | 0.26            |

<sup>a</sup> Blood lead concentrations are log-transformed, beta coefficients are therefore interpreted as percent change in umbilical cord blood lead for a 1% change in maternal blood lead; <sup>b</sup> Collinearity diagnostics indicate a maximum variance inflation factor of 2.2; <sup>c</sup> bolded values are statistically significant at  $\alpha = 0.05$ .
