# Supplementary material for: Maternal iron metabolism gene variants modify umbilical cord blood lead levels by gene-environment interaction: a birth cohort study
Source: PubMed Central journal article supplement (PMC4271345; doi:10.1186/1476-069x-13-77), 2014-10-06
Supplement: 12940_2014_803_MOESM2_ESM.pdf [file 12940_2014_803_MOESM2_ESM.pdf]

Additional File 2: Parameter estimates from a multivariable regression model evaluating the effects of *maternal* iron metabolism gene variants, log-transformed maternal blood lead, and their interaction on log-transformed umbilical cord blood lead.<sup>a, b, c</sup>

| Predictor                       | $\beta$ | 95% CI       | P-value         |
|---------------------------------|---------|--------------|-----------------|
| Constant                        | -0.18   | -0.21, -0.15 | <b>&lt;0.01</b> |
| Maternal Blood Lead (MBL)       | 0.93    | 0.83, 1.02   | <b>&lt;0.01</b> |
| Maternal <i>TF P570S</i>        | 0.01    | -0.05, 0.07  | 0.75            |
| MBL x Maternal <i>TF P570S</i>  | -0.13   | -0.33, 0.06  | 0.18            |
| Maternal <i>HFE H63D</i>        | -0.06   | -0.12, -0.01 | <b>0.05</b>     |
| MBL x Maternal <i>HFE H63D</i>  | -0.05   | -0.23, 0.14  | 0.60            |
| Maternal <i>HFE C282Y</i>       | -0.02   | -0.10, 0.07  | 0.72            |
| MBL x Maternal <i>HFE C282Y</i> | -0.29   | -0.52, -0.05 | <b>0.02</b>     |

<sup>a</sup> Blood lead concentrations are log-transformed, beta coefficients are therefore interpreted as

percent change in umbilical cord blood lead for a 1% change in maternal blood lead; <sup>b</sup>

Collinearity diagnostics indicate a maximum variance inflation factor of 2.1; <sup>c</sup> bolded values are statistically significant at  $\alpha = 0.05$ .
